# Supplementary material for: Processing Conditions of a Medical Grade Poly(Methyl Methacrylate) with the Arburg Plastic Freeforming Additive Manufacturing Process
Source: PubMed Central journal article supplement (PMC7696228; doi:10.3390/polym12112677), 2020-11-12
Supplement: polymers-12-02677-s001.pdf [file polymers-12-02677-s001.pdf]

## Supplementary Information

# Processing Conditions of a Medical Grade Poly(Methyl Methacrylate) with the Arburg Plastic Freeforming Additive Manufacturing Process

Lukas Hentschel <sup>1,\*</sup>, Frank Kynast <sup>2</sup>, Sandra Petersmann <sup>3</sup>, Clemens Holzer <sup>1</sup> and Joamin Gonzalez-Gutierrez <sup>1,\*</sup>

Received: 15 October 2020; Accepted: 11 November 2020; Published: date

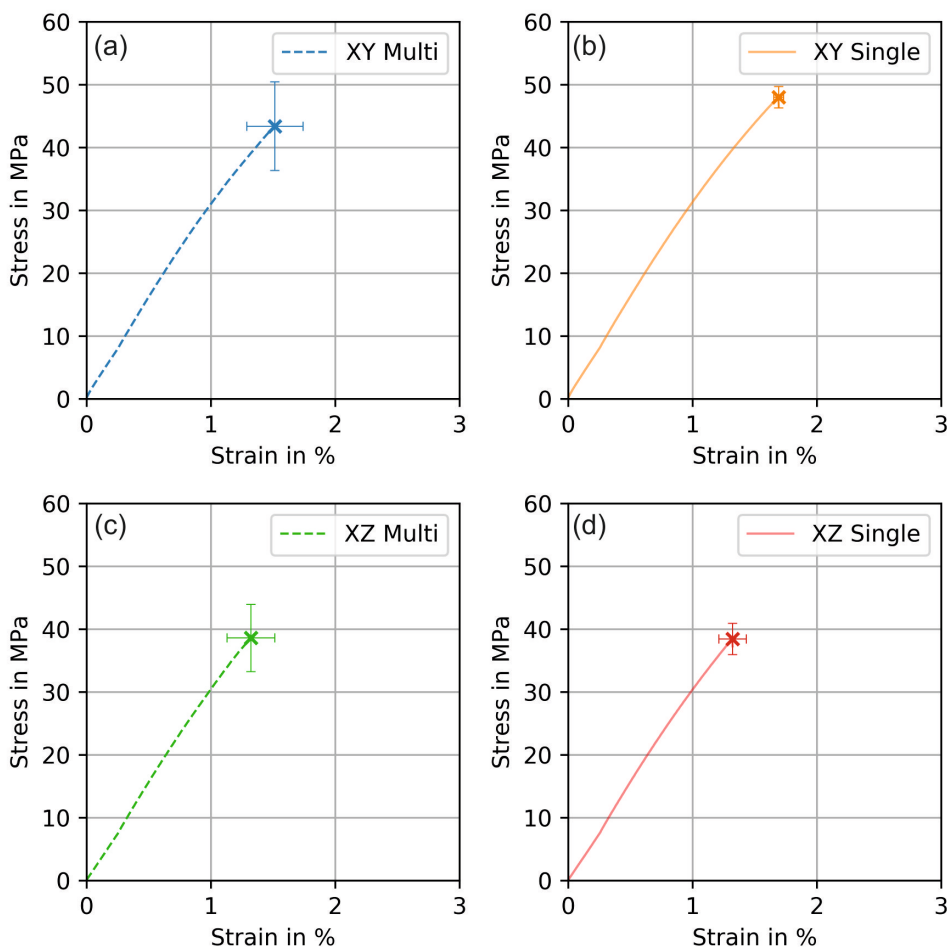

**Figure S1.** Stress-strain curves for the individual treatments investigated: (a) Print orientation XY multiple specimens per batch, (b) print orientation XY and single specimen per batch, (c) print orientation XZ and multiple specimens per batch, and (d) orientation XZ and single specimens per batch

**Publisher's Note:** MDPI stays neutral with regard to jurisdictional claims in published maps and institutional affiliations.

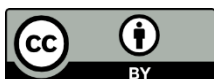

© 2020 by the authors. Submitted for possible open access publication under the terms and conditions of the Creative Commons Attribution (CC BY) license (<http://creativecommons.org/licenses/by/4.0/>).
